# Supplementary material for: Multiscale Systems‐Pharmacology Pipeline to Assess the Prophylactic Efficacy of NRTIs Against HIV‐1
Source: PubMed Central journal article supplement — CPT Pharmacometrics Syst Pharmacol. 2016 Jul 21;5(7):377–87. doi: 10.1002/psp4.12095 (PMC4961081; doi:10.1002/psp4.12095), 2016-07-21
Supplement: PSP4-5-377-s001.pdf [file PSP4-5-377-s001.pdf]

# Supplementary Note 1:

## Pharmacokinetics (module I)

In this note the utilized pharmacokinetic models and their parameterizations are outlined. At the end, we derive concentration time profiles for the intracellularly active NRTI-TP moieties, which can serve as an input for the molecular mechanisms of action model (module II, **Supplementary Note 2**). Note that we modelled *typical* patient profiles, but extensions to virtual patient populations derived from POP-PK models are straight forward.

### SN1 Pharmacokinetics of TDF, FTC and 3TC and their active anabolites

The pharmacokinetics of TDF, FTC and 3TC can be modelled by the following set of ODEs<sup>1,2</sup>:

$$\frac{dC_1(t)}{dt} = \frac{F_{\text{bio}} \cdot k_a \cdot D(t)}{V_1} - C_1(t) \cdot k_e - k_{12} \cdot C_1(t) + k_{21} \cdot C_2(t) \quad (\text{SN1.1})$$

$$\frac{dC_2(t)}{dt} = k_{12} \cdot C_1(t) - k_{21} \cdot C_2(t) \quad (\text{SN1.2})$$

$$\frac{dC_{\text{cell}}(t)}{dt} = \frac{V_{\text{max}} \cdot C_1(t)}{K_M + C_1(t)} - k_{\text{out}} \cdot C_{\text{cell}}(t) \quad (\text{SN1.3})$$

where  $C_1$  and  $C_2$  represent the concentration of the circulating form of the respective NRTI (TFV, 3TC or FTC) in the central compartment (= blood plasma) and in the peripheral compartment in units  $\mu\text{M}$ .  $F_{\text{bio}}$  and  $V_1$  represent the respective oral bio-availability and the volume of the central compartment in liters. The terms  $k_a$  and  $k_e$  denote the absorption and elimination rate constant for the central compartment in units 1/h. Similarly,  $k_{12}$  and  $k_{21}$  are the influx and the apparent outflux rate constants to/from the peripheral compartment respectively (in 1/h). The term  $C_{\text{cell}}$  denotes the intracellular concentration of the active agent of NRTI within the target cell. The term  $V_{\text{max}}$  is the maximum velocity ( $\mu\text{M}/\text{h}$ ) and  $K_M$  ( $\mu\text{M}$ ) the Michaelis-Menten constant for uptake and intracellular anabolism. All parameters are taken from<sup>2</sup>, where an extensive derivation and validation is provided. The parameters are summarized in Table SN1.1.

The amount of drug (in  $\mu\text{mol}$ ) in the dosing compartment  $D(t)$  is modeled according to

$$D(t) = D(\tau_{i-1}) \cdot e^{-k_a t} + I(t) \cdot \text{dose}(\tau_i), \quad (\text{SN1.4})$$

where  $D(\tau_{i-1})$  denotes the amount of the NRTI prodrug in the dosing compartment at the last dosing event  $\tau_{i-1}$ . The term  $I(t)$  denotes a delta dirac or impulse function, which takes the value 1 at the discrete dosing event  $t = \tau_i$  and is otherwise zero.

| Param.           | 3TC                | FTC               | TDF                 | Unit                           |
|------------------|--------------------|-------------------|---------------------|--------------------------------|
| $F_{\text{bio}}$ | 0.86 <sup>†</sup>  | 0.93 <sup>#</sup> | 0.32 <sup>*</sup>   | -                              |
| $k_a$            | 0.945 <sup>§</sup> | 0.542             | 1 <sup>‡</sup>      | 1/h                            |
| $V_1$            | 61.252             | 43.823            | 110.31 <sup>+</sup> | L                              |
| $k_e$            | 0.3347             | 0.409             | 0.1234 <sup>+</sup> | 1/h                            |
| $k_{12}$         | 0.0605             | 0.113             | 0.2926 <sup>+</sup> | 1/h                            |
| $k_{21}$         | 0.0594             | 0.082             | 0.1537 <sup>+</sup> | 1/h                            |
| $V_{\text{max}}$ | 0.5819             | 0.6191            | 0.0032 <sup>+</sup> | $\mu\text{M} \cdot 1/\text{h}$ |
| $K_M$            | 3.3977             | 0.9464            | 0.1020 <sup>+</sup> | $\mu\text{M}$                  |
| $k_{\text{out}}$ | 0.0315             | 0.0176            | 0.006 <sup>+</sup>  | 1/h                            |

Table SN1.1: **Pharmacokinetic (population) parameters.** Excerpt from<sup>2</sup>. <sup>†</sup>fixed value taken from<sup>3</sup>. The <sup>#</sup>fixed value taken from<sup>4</sup>. <sup>\*</sup>fixed value from<sup>5</sup>. <sup>§</sup>fixed value taken from<sup>6</sup>. <sup>‡</sup>fixed value from<sup>7</sup>. <sup>+</sup>The plasma and intracellular pharmacokinetics parameters for TDF are derived from the previous work<sup>1</sup>.

## 22 **References**

- 23 [1] Sulav Duwal, Christof Schütte, and Max von Kleist. Pharmacokinetics and pharmacodynamics of the reverse  
24 transcriptase inhibitor tenofovir and prophylactic efficacy against HIV-1 infection. *PLoS One*, 7(7):e40382,  
25 2012.
- 26 [2] Sulav Duwal and Max von Kleist. Top-down and bottom-up modeling in system pharmacology to understand  
27 clinical efficacy: An example with NRTIs of HIV-1. *European Journal of Pharmaceutical Sciences*, Jan 2016.
- 28 [3] G. J. Yuen, D. M. Morris, P. K. Mydlow, et al. Pharmacokinetics, absolute bioavailability, and absorption  
29 characteristics of lamivudine. *J Clin Pharmacol*, 35(12):1174–1180, Dec 1995.
- 30 [4] Krysten A. Modrzejewski and Ronald A. Herman. Emtricitabine: a once-daily nucleoside reverse transcriptase  
31 inhibitor. *Ann Pharmacother*, 38(6):1006–1014, Jun 2004.
- 32 [5] P. Barditch-Crovo, S. G. Deeks, A. Collier, et al. Phase I/II trial of the pharmacokinetics, safety, and antiretro-  
33 viral activity of tenofovir disoproxil fumarate in human immunodeficiency virus-infected adults. *Antimicrob*  
34 *Agents Chemother*, 45(10):2733–2739, Oct 2001.
- 35 [6] Johanna Linnankoski, Johanna M. Mäkelä, Veli-Pekka Ranta, Arto Urtti, and Marjo Yliperttula. Compu-  
36 tational prediction of oral drug absorption based on absorption rate constants in humans. *J Med Chem*,  
37 49(12):3674–3681, Jun 2006.
- 38 [7] Marie-Claude Gagnieu, Mirna El Barkil, Jean-Michel Livrozet, et al. Population pharmacokinetics of tenofovir  
39 in AIDS patients. *J Clin Pharmacol*, 48(11):1282–1288, Nov 2008.
