# Supplementary material for: Multiscale Systems‐Pharmacology Pipeline to Assess the Prophylactic Efficacy of NRTIs Against HIV‐1
Source: PubMed Central journal article supplement — CPT Pharmacometrics Syst Pharmacol. 2016 Jul 21;5(7):377–87. doi: 10.1002/psp4.12095 (PMC4961081; doi:10.1002/psp4.12095), 2016-07-21
Supplement: PSP4-5-377-s003.pdf [file PSP4-5-377-s003.pdf]

# 1 **Supplementary Note 3: Infection probability** 2 **after virus exposure (module III)**

3 In this note, we derive the equations describing *systemic* infection probabilities after a single exposure with  $n$   
4 viruses in untreated- or PrEP-treated individuals. For estimating the latter, input from module II (MMOA) is  
5 required (inhibition of target cell infection  $\eta$ ). We also explain how the effect of PrEP on inhibiting *systemic*  
6 infection, following exposure to  $i = 1, \dots, \infty$  viruses can be inferred.

## 7 **SN3 Probability of infection after virus exposure**

8 Unprotected intercourse between an HIV-1 infected person (potential transmitter) and an uninfected person (po-  
9 tential recipient) does not always lead to HIV-1 infection of the recipient, suggesting that HIV-1 infection is a  
10 *stochastic* process. The mean infection probability per unprotected intercourse is reported to be very low (less than  
11 1 % per heterosexual contact and less than 10 % per homosexual contact<sup>1</sup>).

12 After intercourse, viruses need to reach a target cell environment receptive for viral replication in order to  
13 establish an infection in the recipient. This process necessitates the virus to overcome several physiological barriers  
14 (i.e. the mucosal barrier). There is evidence that only very few founder viruses establish an infection<sup>2,3</sup>, which  
15 argues that very few viral particles enter a target cell environment after transmission. However, even after reaching  
16 such an environment, infection will not always take place: Viral replication comprises various steps and viruses  
17 can be eliminated before producing any progeny. However, if a single virus succeeds in completing its replication  
18 cycle, a multiple of viral progeny (around 1000) is being produced that renders viral extinction in consecutive  
19 replication cycles unlikely. Thus, if a virus reaches the final stage of its replication cycle (virus release), it can be  
20 considered as a ‘*point of no return*’. Consequently, the probability of completion of the replication cycle by a single  
21 virus in a target cell environment can be considered as a good approximation to the probability of a transmitted  
22 virus establishing an infection.

### 23 **SN3.1 Infection probability after exposure to a single transmitted virus**

24 In order to compute the infection probability, we adapt and simplify a viral dynamic model reported in a previous  
25 work<sup>4</sup>. In the current work, we are primarily concerned with the initial phase of infection, which exhibits intrinsic  
26 stochasticity (see e.g.<sup>5,6</sup>). To properly deal with the stochasticity of the infection process, we derived a *chemical*  
27 *master equation* (CME) from the reaction rate equations of the viral dynamics model presented in<sup>4</sup>. Furthermore,  
28 we simplified it, ignoring the macrophage compartment since it does not contribute to the early infection events in  
29 our model simulation (data not shown). This is also in line with the observations by Ping et al. and Isaacman-Beck  
30 et al.<sup>7,8</sup>, which show that that the transmitter/founder viruses are exclusively T cell-tropic.

31 Figure SN3.1 illustrates the viral dynamic model used. The model considers five possible states of the virus:  
32  $V$ ,  $T_1$ ,  $T_2$ , Pro and  $\emptyset$ . The state  $V$  represents a free virion in imminent proximity of its target cells. In state  $T_1$   
33 the virus has successfully entered a T cell and reverse-transcribed its genome. In state  $T_2$ , the virus has successful  
34 integrated its reverse-transcribed genome and the cell starts producing viral building blocks. State Pro denotes  
35 the proliferative step, i.e. the virus succeeded to produce progeny. Since a single late infected cell  $T_2$  produces a  
36 multitude of viruses (1000 on average<sup>9</sup>), it is very likely that the infection is established once state Pro is reached.  
37 Finally,  $\emptyset$  denotes the clearance of infection before entering state Pro. As can be seen in Figure SN3.1, Pro and  $\emptyset$   
38 are absorbing states.

39 The *chemical master equation* modelling the events that occur after a challenge by a single virus is defined by:

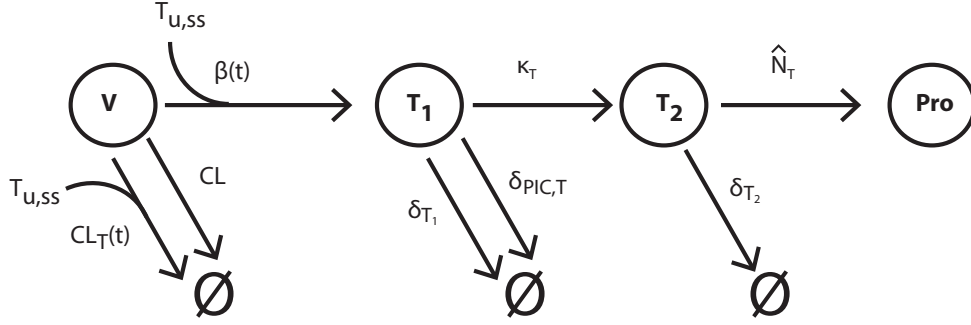

Figure SN3.1: **Schematic representation of the viral replication cycle:** Free virus  $V$  can be cleared with rate constant  $CL$  by the immune system or can be cleared by an unsuccessful attempt to infect a T cell with rate  $CL_T(t)$ . Free virus can also succeed infecting a T cell at rate  $\beta_T(t)$  and advance to state  $T_1$  (early infected T-cell), which denotes the state where the virus has successfully reverse-transcribed its genome. Early infected T cells can be cleared with rate constant  $\delta_{T_1}$  or due to the degradation of the viral pre-integration complex with rate constant  $\delta_{PIC,T}$ . The virus at the  $T_1$  state can advance to the late infected state  $T_2$  (viral genome has been successfully integrated into the host cell, which starts producing viral building blocks) with rate constant  $k_T$ . During state  $T_2$  the infected T cell gets either cleared with the rate  $\delta_{T_2}$ , or it produces viral progeny (state Pro) with rate  $\widehat{N}_T$ .

$$\frac{dP_i(V)}{dt} = - (CL + CL_T(t) \cdot T_{u,SS} + \beta_T(t) \cdot T_{u,SS}) \cdot P_i(V) \quad (\text{SN3.1})$$

$$\frac{dP_i(T_1)}{dt} = \beta_T(t) \cdot T_{u,SS} \cdot P_i(V) - (\delta_{PIC,T} + \delta_{T_1} + k_T) \cdot P_i(T_1) \quad (\text{SN3.2})$$

$$\frac{dP_i(T_2)}{dt} = k_T \cdot P_i(T_1) - (\delta_{T_2} + \widehat{N}_T) \cdot P_i(T_2) \quad (\text{SN3.3})$$

$$\frac{dP_i(\text{Pro})}{dt} = \widehat{N}_T \cdot P_i(T_2) \quad (\text{SN3.4})$$

40 where the term  $P_i(*)$  denotes the probability of state  $*$   $\in \{V, T_1, T_2, \text{Pro}\}$  at the time  $t$ . A viral challenge is simulated  
 41 by numerically integrating the equations above with initial condition  $P(V, t) = 1$ , while the probability of all other  
 42 states is zero initially. Note that we assumed that the number of T-cells  $T_{u,SS}$  in the recipient equals the steady state  
 43 value in the absence of virus, i.e.  $T_{u,SS} = \lambda_T / \delta_T$  where the terms  $\lambda_T$  and  $\delta_T$  denote the production and death rate  
 44 constants of native T cells respectively.

45 From the conservation of probability, we can write the probability of the extinction of a virus as

$$P_i(\emptyset) = 1 - P_i(V) - P_i(T_1) - P_i(T_2) - P_i(\text{Pro}). \quad (\text{SN3.5})$$

46 Further, for  $t \rightarrow \infty$ , the probabilities of states  $V, T_1, T_2$  tend to zero and the stationary values of the probability of  
 47  $P(\text{Pro})$  and  $P(\emptyset)$  become complementary to one another:

$$P_\infty(\emptyset) = 1 - P_\infty(\text{Pro}). \quad (\text{SN3.6})$$

## 48 SN3.2 Effect of NRTIs

49 We have previously shown that the influence of NRTIs on the viral replication cycle can be considered in two  
 50 ways<sup>4,10,11</sup>: Since activated intracellular NRTI-triphosphates inhibit reverse transcription, in the model (Fig. SN3.1)  
 51 they reduce the rate of transition from the state  $V$  to  $T_1$ :

$$\beta_T(t) = (1 - \eta(t)) \cdot \beta_T(\emptyset), \quad (\text{SN3.7})$$

52 where the term  $\beta_T(\emptyset)$  is the rate of successful penetration of the target cell, release of viral contents and subsequent  
 53 reverse transcription in absence of drugs. The term  $(1 - \eta(t))$  is the fraction of activity in the presence of intracel-  
 54 lularly active NRTI-triphosphates, obtained from module II (**Supplementary Note 2**). Secondly, NRTIs increase  
 55 the rate of clearance of virus due to unsuccessful infection:

$$CL_T(t) = \left( \frac{1}{\rho} - (1 - \eta(t)) \right) \cdot \beta_T(\emptyset) \quad (\text{SN3.8})$$

56 where the term  $\rho$  is the probability that the transition is successful in absence of drugs.

57 The influence of NRTIs is implemented using the Emax-model with hill coefficient 1<sup>12</sup>:

$$(1 - \eta(t)) = \frac{IC_{50}}{IC_{50} + C_{cell}(t)} \quad (SN3.9)$$

58 where the term  $C_{cell}(t)$  is the intracellular concentration of active NRTI-triphosphate at time  $t$  and the term  $IC_{50}$   
 59 denotes the intracellular concentration where the target process is inhibited by 50% (see<sup>10</sup> for more details) in  
 60 units  $\mu M$ , which can be determined by fitting the above equation to the output of module II (Supplementary Note  
 61 2). Thus, NRTIs alter the infection probability after viral challenge (eqs. (SN3.1)-(SN3.4)) in a time-dependent  
 62 manner by affecting the terms  $\beta_T(t)$  and  $CL_T(t)$ .

### 63 SN3.3 Steady state intracellular concentration of active anabolites

64 For generating Fig. 3 (main manuscript) we assumed steady state intracellular concentration ranges of 0.03-1.44  
 65  $\mu M$  TFV-DP<sup>13,14,15,16</sup>, 10-66.66  $\mu M$  FTC-TP<sup>16,17,14</sup>, 2.78-55.56  $\mu M$  3TC-TP<sup>18,19,20</sup>, 0.44-0.88  $\mu M$  for ABC-TP<sup>21</sup>,  
 66 0.0056-0.056  $\mu M$  for AZT-TP<sup>22</sup> and 0.034-0.56  $\mu M$  D4T-TP<sup>23</sup>. The unit conversion was performed assuming an  
 67 average cell volume of 180  $\mu m^3$  for resting CD4<sup>+</sup> T-cells<sup>24</sup>. Note that the measurement of intracellular NRTI-TP  
 68 may depend on sample processing (whether a cell homogenate, e.g. peripheral blood mononuclear cells (PBMC)  
 69 is analyzed and whether cells are viable vs. freshly lysed). Furthermore concentrations ranges may depend on the  
 70 sampling design (e.g. first dose vs. steady-state pharmacokinetics; cells derived from HIV-infected individuals vs.  
 71 HIV-negative volunteers). The ranges indicates should thus only provide a rough guidance.

### 72 SN3.4 Infection probability after exposure to a single virus assuming constant drug ef- 73 fect $(1 - \eta)$

74 The set of equations (SN3.1)-(SN3.4) can easily incorporate the effect of a time varying inhibition by NRTIs.  
 75 However, under certain circumstances the term  $(1 - \eta(t))$  may be approximated by a constant. Obviously, in absence  
 76 of drugs the term  $(1 - \eta(t)) = 1$  is constant. Similarly, when NRTIs are administered regularly, concentration  
 77 changes will be very small on the time scales of interest and therefore the change in the magnitude of  $(1 - \eta(t))$  will  
 78 be negligibly small, i.e.  $(1 - \eta(t)) \approx (1 - \eta) \forall t$ . In case of time-invariant  $(1 - \eta)$ , the stationary probabilities of  
 79 viral extinction can be solved analytically. We will make use of this when computing the concentration response  
 80 as shown in Figure 3 (main manuscript). When  $(1 - \eta)$  is constant, we can interpret the viral replication cycle  
 81 (Figure SN3.1) as a multi-stage *branching process* and can compute the stationary probabilities of extinction and  
 82 proliferation analytically. At an intermediate stage, the virus can either advance to the next stage in the replication  
 83 cycle or it can be cleared, terminating the cycle. If a virus reaches the productive (final) stage, the virus can produce  
 84 progeny, whereas at intermediate stages the virus cannot. Of particular interest is the probability that a single virus  
 85 becomes cleared during its replication cycle before it can produce any progeny  $P_{\infty}(\emptyset|V_0 = 1)$ . Since the virus can  
 86 be cleared at different stages of the replication cycle  $P_{\infty}(\emptyset|V_0 = 1)$  can be decomposed:

$$\begin{aligned} P_{\infty}(\emptyset|V_0 = 1) &= p(V \rightarrow \emptyset) \\ &+ p(V \rightarrow T_1 \rightarrow \emptyset) \\ &+ p(V \rightarrow T_1 \rightarrow T_2 \rightarrow \emptyset) \end{aligned} \quad (SN3.10)$$

87 where  $p(V \rightarrow \emptyset)$  denotes the probability that the free virus is cleared. The term  $p(V \rightarrow T_1 \rightarrow \emptyset)$  denotes the joint  
 88 probability that the free virus advances to stage  $T_1$  and is then cleared. Similarly, the term  $p(V \rightarrow T_1 \rightarrow T_2 \rightarrow \emptyset)$   
 89 denotes the joint probability that the free virus advances to  $T_1$  and then to  $T_2$  where it is cleared before producing  
 90 any progeny.

91 When the effect of NRTIs is considered, we derive a compact formula (see subsection SN3.5 for derivation):

$$P_{\infty}(\emptyset|V_0 = 1) = 1 - (1 - \eta) \cdot \alpha \quad (SN3.11)$$

92 with

$$\alpha := \frac{\beta_T(\emptyset) \cdot T_{u,SS}}{CL + \frac{\beta_T(\emptyset) \cdot T_{u,SS}}{\rho}} \cdot \left( 1 - p(T_1 \rightarrow \emptyset|V \rightarrow T_1) - p(T_1 \rightarrow T_2|V \rightarrow T_1) \cdot p(T_2 \rightarrow \emptyset|T_1 \rightarrow T_2) \right), \quad (SN3.12)$$

93 where  $p(T_1 \rightarrow \emptyset|V \rightarrow T_1)$  denotes the conditional probability of viral elimination at stage  $T_1$ , given that  $T_1$  has  
 94 been reached and  $p(T_1 \rightarrow T_2|V \rightarrow T_1) \cdot p(T_2 \rightarrow \emptyset|T_1 \rightarrow T_2) = p(T_2 \rightarrow \emptyset|V \rightarrow T_1 \rightarrow T_2)$  denotes the probability  
 95 of viral clearance in stage  $T_2$ , conditioned  $T_2$  has been reached.

96 In the absence of drug, we have  $(1 - \eta) = 1$ , thus from the Eqn (SN3.11) it follows that  $\alpha = 1 - P_\infty(\emptyset|V = 1)$ .  
 97 Thus, the term  $\alpha$  can be interpreted as the probability that a single virus can complete the replication cycle and  
 98 produce viral progeny in the absence of NRTIs. Of particular interest is the relation revealed by the eq. (SN3.11),  
 99 which highlights that NRTIs reduce the probability of proliferation (infection) by a factor  $(1 - \eta)$  corresponding to  
 100 the efficacy against their targeted process.

#### 101 **SN3.4.1 Infection probability after exposure to $n$ viruses (*per challenge*)**

102 Up to now, we have discussed the probability of infection considering that a single virus has reached a target cell  
 103 environment. The infection event, given  $n = 0 \dots \infty$  transmitted viruses, can be thought of as a *Bernoulli chain*.  
 104 Under the assumption of independence, the probability that all  $n$  viruses fail to produce progeny is given by:

$$P_t(\emptyset|V_0 = n) = (P_t(\emptyset|V_0 = 1))^n \quad (\text{SN3.13})$$

105 Thus, the infection probability (any of the  $n$  viruses succeeds in producing progeny and  $t \rightarrow \infty$ ) is given by

$$P(\text{inf}|V_0 = n) = 1 - (P_\infty(\emptyset|V_0 = 1))^n = 1 - (1 - P_\infty(\text{Pro}|V_0 = 1))^n \quad (\text{SN3.14})$$

#### 106 **SN3.4.2 Efficacy of PrEP *per challenge***

107 From here it is straightforward to compute the efficacy of PrEP *per challenge* with  $i = 1, \dots, \infty$  viruses (e.g. after  
 108 coitus with an infected individual),

$$\varphi = 1 - \frac{P_S(\text{inf}|V_0 = i)}{P_\emptyset(\text{inf}|V_0 = i)}. \quad (\text{SN3.15})$$

109 Where  $P_S(\text{inf}|V_0 = i)$  and  $P_\emptyset(\text{inf}|V_0 = i)$  denote the probabilities of infection after exposure to  $i$  viruses when a  
 110 PrEP strategy  $S$  was applied vs. PrEP was not applied  $\emptyset$ . Note that  $\varphi$  is not defined in the case that no virus is  
 111 being transmitted. The PrEP efficacy *per typical virus challenge*  $\psi$  is then defined by,

$$\psi = 1 - \sum_{i=1}^{\infty} P(V_0 = i|n > 0)(1 - \varphi) \quad (\text{SN3.16})$$

112 In the equation above,  $P(V_0 = i|n > 0) = P(V_0 = i)/(1 - P(V_0 = 0))$  is the conditional probability that  $i = 1, \dots, \infty$   
 113 viruses reach a target-site compartment after exposure (e.g. coitus) among all cases were there was an actual  
 114 exposure  $n > 0$ . The exposure probabilities are detailed in **Supplementary Note 4**.

### 115 SN3.5 Derivation of results in section SN3.4 and parametrization

116 The probability of extinction in eq. (SN3.10) consists of the joint probabilities which can be decomposed into  
 117 conditional probabilities which directly relate to model parameters. For example, the term  $p(V \rightarrow T_1 \rightarrow \emptyset)$  is  
 118 equal to the probability that a virus  $V$  reaches the  $T_1$  stage  $p(V \rightarrow T_1)$  times the conditional probability that the  
 119 virus is cleared in the  $T_1$  stage when it is there  $p(T_1 \rightarrow \emptyset|V \rightarrow T_1)$ . Equation (SN3.10) can thus be rewritten

$$\begin{aligned} P_\infty(\emptyset|V_0 = 1) &= p(V \rightarrow \emptyset) \\ &+ p(V \rightarrow T_1) \cdot p(T_1 \rightarrow \emptyset|V \rightarrow T_1) \\ &+ p(V \rightarrow T_1) \cdot p(T_1 \rightarrow T_2|V \rightarrow T_1) \cdot p(T_2 \rightarrow \emptyset|T_1 \rightarrow T_2) \end{aligned} \quad (\text{SN3.17})$$

120 Note that in the above equation all terms denote the probability that a particular reaction happens next, for example  
 121  $p(T_1 \rightarrow \emptyset|V \rightarrow T_1)$  denotes the probability that reaction  $T_1 \rightarrow \emptyset$  happens next when the virus is in state  $T_1$ .

122 Given a single free virus, the probabilities of different reactions to fire next can be written as follows:

$$p(V \rightarrow \emptyset) = \frac{\text{CL} + \text{CL}_T(t) \cdot T_{u,SS}}{\text{CL} + \text{CL}_T(t) \cdot T_{u,SS} + \beta_T(t) \cdot T_{u,SS}} \quad (\text{SN3.18})$$

$$p(V \rightarrow T_1) = \frac{\beta_T(t) \cdot T_{u,SS}}{\text{CL} + \text{CL}_T(t) \cdot T_{u,SS} + \beta_T(t) \cdot T_{u,SS}} \quad (\text{SN3.19})$$

$$p(T_1 \rightarrow \emptyset|V \rightarrow T_1) = \frac{\delta_{\text{PIC},T} + \delta_{T_1}}{\delta_{\text{PIC},T} + \delta_{T_1} + k_T} \quad (\text{SN3.20})$$

$$p(T_1 \rightarrow T_2|V \rightarrow T_1) = \frac{k_T}{\delta_{\text{PIC},T} + \delta_{T_1} + k_T} \quad (\text{SN3.21})$$

$$p(T_2 \rightarrow \emptyset|T_1 \rightarrow T_2) = \frac{\delta_{T_2}}{\delta_{T_2} + \widehat{N}_T} \quad (\text{SN3.22})$$

123 Substitution of (SN3.18) and (SN3.19) in (SN3.17) gives following equation:

$$P_\infty(\emptyset|V_0 = 1) = \frac{\text{CL} + \text{CL}_T(t) \cdot T_{u,SS} + \beta_T(t) \cdot T_{u,SS} \cdot (pT_1 + pT_2)}{\text{CL} + \text{CL}_T(t) \cdot T_{u,SS} + \beta_T(t) \cdot T_{u,SS}} \quad (\text{SN3.23})$$

124 where, for ease of readability we used the following shorthand

$$\begin{aligned} pT_1 &:= p(T_1 \rightarrow \emptyset|V \rightarrow T_1) \\ pT_2 &:= p(T_1 \rightarrow T_2|V \rightarrow T_1) \cdot p(T_2 \rightarrow \emptyset|T_1 \rightarrow T_2) \end{aligned} \quad (\text{SN3.24})$$

125 The denominator of eq. (SN3.23) can be simplified by substituting eq. (SN3.7) and eq. (SN3.8) as shown  
 126 below:

$$\begin{aligned} &\text{CL} + \text{CL}_T(t) \cdot T_{u,SS} + \beta_T(t) \cdot T_{u,SS} \\ &= \text{CL} + \left( \frac{1}{\rho} - (1 - \eta) \right) \cdot \beta_T(\emptyset) \cdot T_{u,SS} + (1 - \eta) \cdot \beta_T(\emptyset) \cdot T_{u,SS} \\ &= \text{CL} + \frac{\beta_T(\emptyset) \cdot T_{u,SS}}{\rho} - \cancel{(1 - \eta) \cdot \beta_T(\emptyset) \cdot T_{u,SS}} + \cancel{(1 - \eta) \cdot \beta_T(\emptyset) \cdot T_{u,SS}} \\ &= \text{CL} + \frac{\beta_T(\emptyset) \cdot T_{u,SS}}{\rho} \end{aligned} \quad (\text{SN3.25})$$

127 Similarly, the numerator of eq. (SN3.23) can be also simplified

$$\begin{aligned} &\text{CL} + \text{CL}_T(t) \cdot T_{u,SS} + \beta_T(t) \cdot T_{u,SS} \cdot (pT_1 + pT_2) \\ &= \text{CL} + \left( \frac{1}{\rho} - (1 - \eta) \right) \cdot \beta_T(\emptyset) \cdot T_{u,SS} + (1 - \eta) \cdot \beta_T(\emptyset) \cdot T_{u,SS} \cdot (pT_1 + pT_2) \\ &= \text{CL} + \frac{\beta_T(\emptyset) \cdot T_{u,SS}}{\rho} - (1 - \eta) \cdot \beta_T(\emptyset) \cdot T_{u,SS} + (1 - \eta) \cdot \beta_T(\emptyset) \cdot T_{u,SS} \cdot (pT_1 + pT_2) \\ &= \text{CL} + \frac{\beta_T(\emptyset) \cdot T_{u,SS}}{\rho} - (1 - \eta) \cdot \beta_T(\emptyset) \cdot T_{u,SS} \cdot (1 - (pT_1 + pT_2)) \end{aligned} \quad (\text{SN3.26})$$

128 Substituting eqs. (SN3.25)-(SN3.26) into eq. (SN3.23) gives

$$\begin{aligned}
 P_{\infty}(\emptyset|V_0 = 1) &= 1 - \frac{(1 - \eta) \cdot \beta_T(\emptyset) \cdot T_{u,SS} \cdot (1 - (pT_1 + pT_2))}{CL + \frac{\beta_T(\emptyset) \cdot T_{u,SS}}{\rho}} \\
 &= 1 - (1 - \eta) \cdot \left( \frac{\beta_T(\emptyset) \cdot T_{u,SS} \cdot (1 - (pT_1 + pT_2))}{CL + \frac{\beta_T(\emptyset) \cdot T_{u,SS}}{\rho}} \right) \quad (\text{SN3.27}) \\
 &= 1 - (1 - \eta) \cdot \alpha \quad (\text{SN3.28})
 \end{aligned}$$

129 where

$$\alpha := \frac{\beta_T(\emptyset) \cdot T_{u,SS} \cdot (1 - (pT_1 + pT_2))}{CL + \frac{\beta_T(\emptyset) \cdot T_{u,SS}}{\rho}} \quad (\text{SN3.29})$$

130 In absence of drug, we have  $(1 - \eta) = 1$ , thus from eq. (SN3.28) it follows that  $\alpha = 1 - P(\emptyset|V_0 = 1)$  and the  
 131 term  $\alpha$  can be interpreted as the probability that a single virus succeeds to produce progeny in absence of NRTIs.

132  
 133 The rate constants for the viral dynamics model are summarized in<sup>4,10</sup> and are also reported in Table SN3.1  
 134 below. The term  $\alpha$  is computed after substituting all rate constants in eq. (SN3.29) and was found to be 0.0996, i.e.  
 135 the probability of infection when a single virus is in a target cell compartment is roughly 10%.

| Parameter                | Value              | Reference |
|--------------------------|--------------------|-----------|
| $\lambda_T$              | $2 \cdot 10^9$     | 25        |
| $\delta_T, \delta_{T_1}$ | 0.02               | 9         |
| $\delta_{T_2}$           | 1                  | 26        |
| $\delta_{PIC,T}$         | 0.35               | 27,28     |
| $k_T$                    | 0.35               | 28        |
| $\beta_T(\emptyset)$     | $8 \cdot 10^{-12}$ | 29        |
| $\widehat{N}_T$          | 1000               | 9         |
| CL(naive)                | 2.3                | 30,6      |

Table SN3.1: **Parameters used for the viral dynamics model** Excerpt from<sup>4</sup>, expect for CL(naive), which assumed that virus clearance is smaller in virus-naive individuals compared to infected individuals, in line with<sup>31,32</sup>. All parameters refer to the absence of drug treatment 0. All parameters in units [1/day]. )

## References

- 136
- 137 [1] R. A. Royce, A. Seña, W Cates, Jr, and M. S. Cohen. Sexual transmission of HIV. *N Engl J Med*,  
138 336(15):1072–1078, Apr 1997.
- 139 [2] Brandon F. Keele, Elena E. Giorgi, Jesus F. Salazar-Gonzalez, et al. Identification and characterization  
140 of transmitted and early founder virus envelopes in primary HIV-1 infection. *Proc Natl Acad Sci U S A*,  
141 105(21):7552–7557, May 2008.
- 142 [3] Jonathan M. Carlson, Malinda Schaefer, Daniela C. Monaco, et al. HIV transmission. selection bias at the  
143 heterosexual HIV-1 transmission bottleneck. *Science*, 345(6193):1254031, Jul 2014.
- 144 [4] Max von Kleist, Stephan Menz, and Wilhelm Huisinga. Drug-class specific impact of antivirals on the  
145 reproductive capacity of HIV. *PLoS computational biology*, 6(3):e1000720, 2010.
- 146 [5] A. Kamina, R. W. Makuch, and H. Zhao. A stochastic modeling of early HIV-1 population dynamics. *Math*  
147 *Biosci*, 170(2):187–198, Apr 2001.
- 148 [6] W. Y. Tan and H. Wu. Stochastic modeling of the dynamics of CD4+ T-cell infection by HIV and some  
149 Monte Carlo studies. *Math Biosci*, 147(2):173–205, Jan 1998.
- 150 [7] Li-Hua Ping, Sarah B. Joseph, Jeffrey A. Anderson, et al. Comparison of viral Env proteins from acute and  
151 chronic infections with subtype c human immunodeficiency virus type 1 identifies differences in glycosylation  
152 and CCR5 utilization and suggests a new strategy for immunogen design. *J Virol*, 87(13):7218–7233, Jul  
153 2013.
- 154 [8] Jesse Isaacman-Beck, Emilia A. Hermann, Yanjie Yi, et al. Heterosexual transmission of human immunode-  
155 ficiency virus type 1 subtype c: Macrophage tropism, alternative coreceptor use, and the molecular anatomy  
156 of CCR5 utilization. *J Virol*, 83(16):8208–8220, Aug 2009.
- 157 [9] Ahmad R. Sedaghat, Robert F. Siliciano, and Claus O. Wilke. Constraints on the dominant mechanism for  
158 HIV viral dynamics in patients on raltegravir. *Antivir Ther*, 14(2):263–271, 2009.
- 159 [10] Sulav Duwal and Max von Kleist. Top-down and bottom-up modeling in system pharmacology to understand  
160 clinical efficacy: An example with NRTIs of HIV-1. *European Journal of Pharmaceutical Sciences*, Jan  
161 2016.
- 162 [11] Max von Kleist, Philipp Metzner, Roland Marquet, and Christof Schütte. HIV-1 polymerase inhibition by  
163 nucleoside analogs: cellular- and kinetic parameters of efficacy, susceptibility and resistance selection. *PLoS*  
164 *Comput Biol*, 8(1):e1002359, Jan 2012.
- 165 [12] Lin Shen, Susan Peterson, Ahmad R. Sedaghat, et al. Dose-response curve slope sets class-specific limits on  
166 inhibitory potential of anti-HIV drugs. *Nat Med*, 14(7):762–766, Jul 2008.
- 167 [13] Trevor Hawkins, Wenoah Veikley, Robert L St Claire, 3rd, et al. Intracellular pharmacokinetics of teno-  
168 fover diphosphate, carbovir triphosphate, and lamivudine triphosphate in patients receiving triple-nucleoside  
169 regimens. *J Acquir Immune Defic Syndr*, 39(4):406–411, Aug 2005.
- 170 [14] Jessica L. Adams, Craig Sykes, Prema Menezes, et al. Tenofovir diphosphate and emtricitabine triphosphate  
171 concentrations in blood cells compared with isolated peripheral blood mononuclear cells. *JAIDS Journal of*  
172 *Acquired Immune Deficiency Syndromes*, 62(3):260–266, Mar 2013.
- 173 [15] K. Madrasi, R. N. Burns, C. W. Hendrix, M. J. Fossler, and A. Chaturvedula. Linking the population pharma-  
174 cokinetics of tenofovir and its metabolites with its cellular uptake and metabolism. *CPT Pharmacometrics*  
175 *Syst Pharmacol*, 3:e147, 2014.
- 176 [16] Akil Jackson, Graeme Moyle, Victoria Watson, et al. Tenofovir, emtricitabine intracellular and plasma, and  
177 efavirenz plasma concentration decay following drug intake cessation: implications for HIV treatment and  
178 prevention. *J Acquir Immune Defic Syndr*, 62(3):275–281, Mar 2013.



- 179 [17] Laurene H. Wang, John Begley, Robert L St Claire, 3rd, et al. Pharmacokinetic and pharmacodynamic  
180 characteristics of emtricitabine support its once daily dosing for the treatment of HIV infection. *AIDS Res*  
181 *Hum Retroviruses*, 20(11):1173–1182, Nov 2004.
- 182 [18] Zexun Zhou, John H. Rodman, Patricia M. Flynn, et al. Model for intracellular lamivudine metabolism in pe-  
183 ripheral blood mononuclear cells ex vivo and in human immunodeficiency virus type 1-infected adolescents.  
184 *Antimicrob Agents Chemother*, 50(8):2686–2694, Aug 2006.
- 185 [19] K. H. Moore, J. E. Barrett, S. Shaw, et al. The pharmacokinetics of lamivudine phosphorylation in peripheral  
186 blood mononuclear cells from patients infected with HIV-1. *AIDS*, 13(16):2239–2250, Nov 1999.
- 187 [20] L. J. Else, A. Jackson, R. Puls, et al. Pharmacokinetics of lamivudine and lamivudine-triphosphate after ad-  
188 ministration of 300 milligrams and 150 milligrams once daily to healthy volunteers: Results of the ENCORE  
189 2 study. *Antimicrobial Agents and Chemotherapy*, 56(3):1427–1433, Dec 2011.
- 190 [21] Adrian S. Ray, Aravind Basavapathruni, and Karen S. Anderson. Mechanistic studies to understand the pro-  
191 gressive development of resistance in human immunodeficiency virus type 1 reverse transcriptase to abacavir.  
192 *J Biol Chem*, 277(43):40479–40490, Oct 2002.
- 193 [22] Peter L. Anderson, Jia-Hua Zheng, Tracy King, et al. Concentrations of zidovudine- and lamivudine-  
194 triphosphate according to cell type in hiv-seronegative adults. *AIDS*, 21(14):1849–1854, Sep 2007.
- 195 [23] François Becher, Roland Landman, S. Mboup, et al. Monitoring of didanosine and stavudine intracellular  
196 trisphosphorylated anabolite concentrations in HIV-infected patients. *AIDS*, 18(2):181–187, Jan 2004.
- 197 [24] E. H. Chapman, A. S. Kurec, and F. R. Davey. Cell volumes of normal and malignant mononuclear cells. *J*  
198 *Clin Pathol*, 34(10):1083–1090, Oct 1981.
- 199 [25] X. Wei, S. K. Ghosh, M. E. Taylor, et al. Viral dynamics in human immunodeficiency virus type 1 infection.  
200 *Nature*, 373(6510):117–122, Jan 1995.
- 201 [26] M. Markowitz, M. Louie, A. Hurley, et al. A novel antiviral intervention results in more accurate assessment  
202 of human immunodeficiency virus type 1 replication dynamics and T-cell decay in vivo. *J Virol*, 77:5037–  
203 5038, 2003.
- 204 [27] Kersten K. Koelsch, Lin Liu, Richard Haubrich, et al. Dynamics of total, linear nonintegrated, and integrated  
205 HIV-1 DNA in vivo and in vitro. *J Infect Dis*, 197(3):411–419, Feb 2008.
- 206 [28] Yan Zhou, Haili Zhang, Janet D. Siliciano, and Robert F. Siliciano. Kinetics of human immunodeficiency  
207 virus type 1 decay following entry into resting CD4+ T cells. *J Virol*, 79(4):2199–2210, Feb 2005.
- 208 [29] Ahmad R Sedaghat, Jason B Dinoso, Lin Shen, Claus O Wilke, and Robert F Siliciano. Decay dynamics of  
209 HIV-1 depend on the inhibited stages of the viral life cycle. *Proc Natl Acad Sci U S A*, 105(12):4832–4837,  
210 Mar 2008.
- 211 [30] Henry C. Tuckwell, Patrick D. Shipman, and Alan S. Perelson. The probability of HIV infection in a new  
212 host and its reduction with microbicides. *Mathematical Biosciences*, 214(1-2):81–86, Jul 2008.
- 213 [31] Sulav Duwal, Christof Schütte, and Max von Kleist. Pharmacokinetics and pharmacodynamics of the reverse  
214 transcriptase inhibitor tenofovir and prophylactic efficacy against HIV-1 infection. *PLoS One*, 7(7):e40382,  
215 2012.
- 216 [32] M. Frank, M. von Kleist, A. Kunz, et al. Quantifying the impact of nevirapine-based prophylaxis strategies to  
217 prevent mother-to-child transmission of HIV-1: a combined pharmacokinetic, pharmacodynamic, and viral  
218 dynamic analysis to predict clinical outcomes. *Antimicrob Agents Chemother*, 55(12):5529–5540, Dec 2011.
